# Supplementary material
Source: MDPI journal article supplement (https://www.mdpi.com/2673-4168/2/2/14)
Supplement: s1 [file s1]

**Table S1.** Anthropometrics and BC indices (mean  $\pm$  SD).

| <b>Whole sample (N = 217)</b> |                 |                  |                   |                  |
|-------------------------------|-----------------|------------------|-------------------|------------------|
| <b>Parameter</b>              | <b>Baseline</b> | <b>Follow up</b> | <b>Mean Diff.</b> | <b>p-Value</b>   |
| BM (kg)                       | 74.7 $\pm$ 16.9 | 71.8 $\pm$ 15.2  | -2.9 $\pm$ 4.2    | <b>&lt;0.001</b> |
| BMI (kg/m <sup>2</sup> )      | 25.4 $\pm$ 4.5  | 24.4 $\pm$ 3.9   | -1.0 $\pm$ 1.4    | <b>&lt;0.001</b> |
| BFM/BH (kg/cm) <sup>†</sup>   | 0.11 $\pm$ 0.05 | 0.09 $\pm$ 0.05  | -0.02 $\pm$ 0.02  | <b>&lt;0.001</b> |
| FFM/BH (kg/cm) <sup>†</sup>   | 0.32 $\pm$ 0.06 | 0.32 $\pm$ 0.06  | 0                 | N/A              |
| TBM (kg)                      | 39.5 $\pm$ 8.8  | 39.9 $\pm$ 8.4   | 0.4 $\pm$ 6.7     | 0.465            |
| ECW (kg)                      | 16.5 $\pm$ 3.2  | 16.4 $\pm$ 3.0   | -0.1 $\pm$ 2.9    | 0.398            |
| ICW (kg)                      | 23.0 $\pm$ 5.8  | 23.5 $\pm$ 5.8   | 0.5 $\pm$ 4.9     | 0.146            |
| ECW:ICW ratio (%)             | 73.7 $\pm$ 11.5 | 71.3 $\pm$ 9.6   | -2.4 $\pm$ 12.7   | <b>0.006</b>     |
| PhA (°)                       | 5.9 $\pm$ 0.7   | 6.1 $\pm$ 0.8    | 0.2 $\pm$ 0.7     | <b>&lt;0.001</b> |

BM: body mass. BMI: body mass index. BFM: body fat mass. FFM: fat-free mass. TBM: total body water. ECW: extracellular water. ICW: intracellular water. PhA: whole-body phase angle. Mean Diff.: Mean difference. N/A: not applicable. A paired *t*-test was used. <sup>†</sup>Adjusted for BH. Statistically significant values are written in bold.

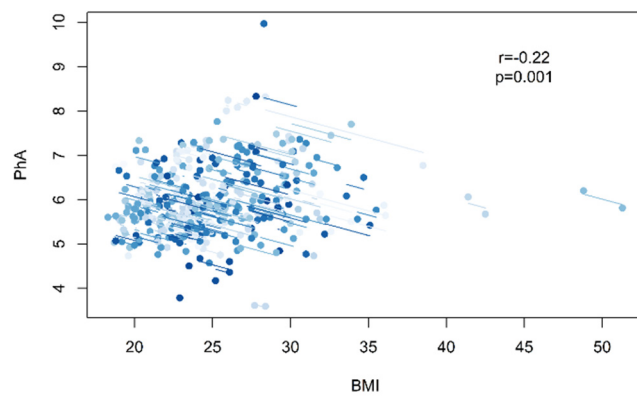

**Figure S1:** Association between PhA and BMI.

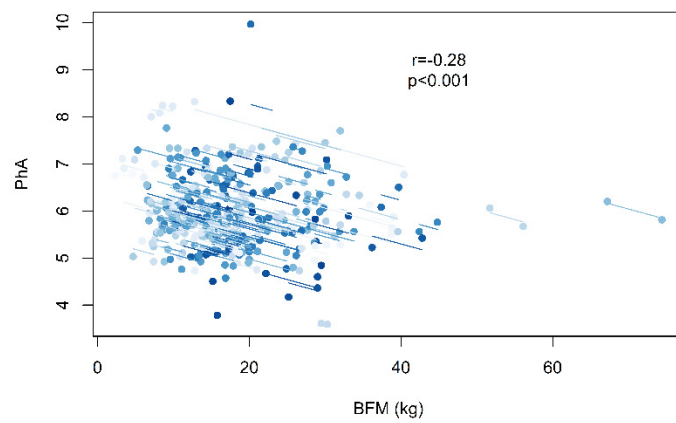

**Figure S2:** Association between PhA and BFM.

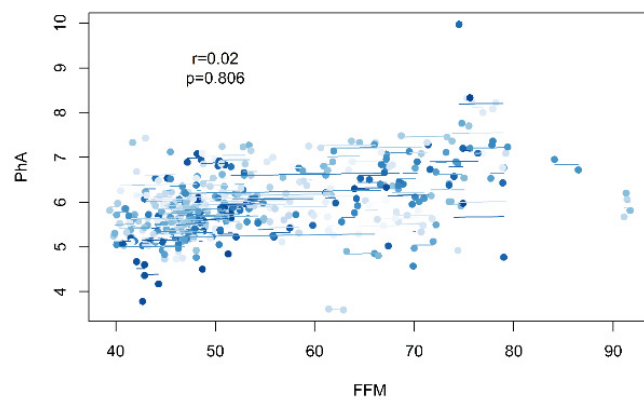

**Figure S3:** Association between PhA and FFM.
